# Supplementary material for: A Combination of an Angiotensin II Receptor and a Neprilysin Inhibitor Attenuates Liver Fibrosis by Preventing Hepatic Stellate Cell Activation
Source: MDPI journal article supplement (doi:10.3390/biomedicines11051295), 2023-04-27
Supplement: s1 [file s1]

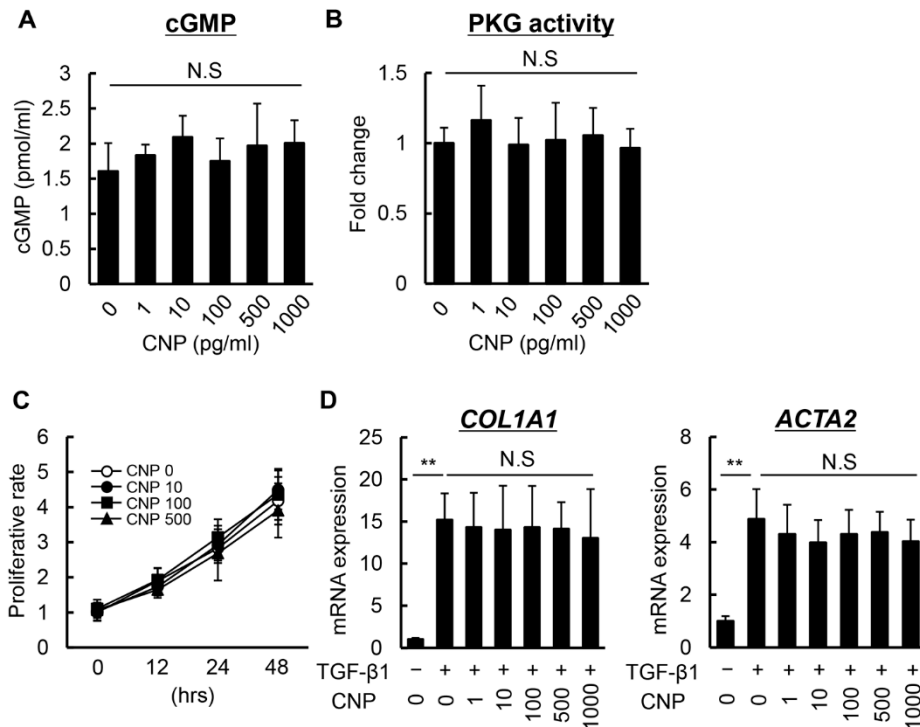

**Supplementary Figure S1.** (A) Intracellular cGMP levels in LX-2 cells incubated with CNP (0-1000 pg/ml). (B) Intracellular PKG activity in LX-2 cells incubated with CNP (0-1000 pg/ml). (C) Cell proliferation of LX-2 cells incubated with CNP (0-500 pg/ml). (D) Relative mRNA expression of *ACTA2* and *COL1A1* in LX-2 cells incubated with TGF-β1 (10 ng/ml), ANP (0, 100 and 500 pg/ml). *GAPDH* was used as internal control. Quantitative values are relatively indicated as fold changes to the values of non-treatment groups. Data are mean ± SD (n=8). \*\* p < 0.01, indicating a significant difference between groups. N.S.; not significant, CNP; C-type natriuretic peptide, PKG; protein kinase G.

**Supplementary Table S1. List of primers used in q-PCR.**

| gene          | Sense (5'-3')         | Antisense (5'-3')       |
|---------------|-----------------------|-------------------------|
| <b>Mouse</b>  |                       |                         |
| <i>Acta2</i>  | CTGACAGAGGCACCACTGAA  | CATCTCCAGAGTCCAGCACA    |
| <i>Col1a1</i> | GAGCGGAGAGTACTGGATCG  | GCTTCTTTTCCTTGGGGTTC    |
| <i>Tgfb1</i>  | TTGCTTCAGCTCCACAGAGA  | TGGTTGTAGAGGGCAAGGAC    |
| <i>Agtr1</i>  | ATGGCTGGCATTGTCTGG    | GTTGAGTTGGTCTCAGACAC    |
| <i>Gapdh</i>  | CTGCGACTTCAACAGCAACT  | GAGTTGGGATAGGGCCTCTC    |
| <b>Human</b>  |                       |                         |
| <i>ACTA2</i>  | GAGACCCTGTTCCAGCCATC  | TACATAGTGGTGCCCCCTGA    |
| <i>COL1A1</i> | CCAAATCTGTCTCCCCAGAA  | TCAAAAACGAAGGGGAGATG    |
| <i>MMP2</i>   | TGACGGTAAGGACGGACTC   | ATACTTACACGGACCACTTG    |
| <i>TIMP1</i>  | GCCCAGAGAGACACCAGAGAA | CTATCAGCCACAGCAACAACAGG |
| <i>TIMP2</i>  | GCAGGAGGAATCGGTGAGGTC | ACAGGCAAGAAGCAATGGCAAC  |
| <i>CTGF</i>   | ACCGACTGGAAGACACGTTTG | CCAGGTCAGCTTCGCAAGG     |
| <i>GAPDH</i>  | CCAAGGAGTAAGACCCCTGG  | TGGTTGAGCACAGGGTACTT    |
